# Supplementary material for: Cellobiohydrolase B of Aspergillus niger over-expressed in Pichia pastoris stimulates hydrolysis of oil palm empty fruit bunches
Source: PeerJ. 2017 Oct 12;5:e3909. doi: 10.7717/peerj.3909 (PMC5641429; doi:10.7717/peerj.3909)
Supplement: Data S2 — Data of FTIR analysis. [file peerj-05-3909-s002.xlsx]

## Sheet: 300951..
PE IR SPECTRUM ASCII PEDS 1.60
-1
~SP.SP
1930-09-15
11:11:54
1930-09-15
11:14:45
Administrator
EFB CONTROL
650
4
SPECTRUM 400,CPU32 MAIN 00.03.3143 20-JUNE-2008 10:24:13
MIR TGS
MIR
OPTKBR
82486
0.2
4
STRONG
RATIO
SPECTRUM
MAGNITUDE
UNIVERSAL ATR
DOUBLE
COMBINED
0
#HDR
-1
-1
#GR
CM-1
A
1.19209e-07
0
4000
-1
3351
8
0.297969
0.001658
	EFB control	CTec2	CTec2+CbhB
4000	0.002093	-0.00227	0.000978
3999	0.002091	-0.002286	0.000985
3998	0.002089	-0.002309	0.000992
3997	0.002085	-0.002328	0.000998
3996	0.002084	-0.002337	0.001001
3995	0.002091	-0.002332	0.001001
3994	0.002107	-0.00232	0.001001
3993	0.002127	-0.002309	0.001
3992	0.002148	-0.002302	0.001003
3991	0.002167	-0.002292	0.001012
3990	0.002184	-0.00227	0.001028
3989	0.002199	-0.002239	0.00105
3988	0.002212	-0.002206	0.001074
3987	0.002224	-0.002184	0.001093
3986	0.002233	-0.002179	0.001103
3985	0.002238	-0.002192	0.001103
3984	0.002242	-0.002214	0.001097
3983	0.002246	-0.002234	0.001092
3982	0.002257	-0.002246	0.001093
3981	0.002276	-0.002245	0.001103
3980	0.002303	-0.002233	0.001118
3979	0.002332	-0.002214	0.001136
3978	0.002352	-0.002196	0.00115
3977	0.002357	-0.00219	0.001156
3976	0.002351	-0.002198	0.001156
3975	0.002343	-0.002216	0.001152
3974	0.002341	-0.002233	0.00115
3973	0.002345	-0.002236	0.001153
3972	0.002353	-0.00222	0.00116
3971	0.00236	-0.002194	0.001167
3970	0.002363	-0.002173	0.001169
3969	0.002364	-0.002172	0.001167
3968	0.002366	-0.002185	0.001167
3967	0.00237	-0.002196	0.001174
3966	0.002376	-0.002195	0.001191
3965	0.002381	-0.002187	0.00121
3964	0.002382	-0.002184	0.001227
3963	0.002384	-0.002187	0.00124
3962	0.002389	-0.002189	0.001258
3961	0.002398	-0.002182	0.00128
3960	0.002409	-0.00217	0.001301
3959	0.002418	-0.002158	0.001312
3958	0.002423	-0.002151	0.00131
3957	0.002428	-0.002143	0.001299
3956	0.002436	-0.002125	0.001291
3955	0.002447	-0.002091	0.001291
3954	0.002461	-0.002046	0.001303
3953	0.002472	-0.002	0.001323
3952	0.002479	-0.001963	0.001349
3951	0.002481	-0.001942	0.001374
3950	0.002479	-0.001936	0.001393
3949	0.002475	-0.001943	0.001402
3948	0.002473	-0.001953	0.001403
3947	0.002476	-0.001961	0.001401
3946	0.002485	-0.001977	0.001394
3945	0.002496	-0.002013	0.00138
3944	0.002503	-0.002065	0.001363
3943	0.002499	-0.002107	0.001356
3942	0.002487	-0.002119	0.001364
3941	0.002475	-0.002102	0.001382
3940	0.002471	-0.002073	0.001401
3939	0.002477	-0.002049	0.001415
3938	0.00249	-0.002034	0.001424
3937	0.002506	-0.002025	0.00143
3936	0.00252	-0.002013	0.001433
3935	0.002527	-0.001992	0.001434
3934	0.002527	-0.001966	0.001436
3933	0.002519	-0.001954	0.00144
3932	0.002503	-0.001976	0.001444
3931	0.002478	-0.002031	0.001446
3930	0.002449	-0.002091	0.001447
3929	0.002429	-0.002126	0.00145
3928	0.00243	-0.002132	0.001455
3927	0.002452	-0.002128	0.00146
3926	0.00248	-0.002129	0.001464
3925	0.002499	-0.002135	0.001468
3924	0.002505	-0.002141	0.001472
3923	0.002501	-0.002143	0.001474
3922	0.002493	-0.002139	0.001476
3921	0.002487	-0.002131	0.001479
3920	0.002486	-0.002125	0.001482
3919	0.002493	-0.002125	0.001485
3918	0.002504	-0.002131	0.001488
3917	0.002524	-0.002132	0.001492
3916	0.002556	-0.002127	0.001496
3915	0.002596	-0.002121	0.001501
3914	0.00263	-0.002118	0.001506
3913	0.002646	-0.00212	0.00151
3912	0.002643	-0.002123	0.001514
3911	0.002624	-0.002127	0.001518
3910	0.002587	-0.00213	0.001521
3909	0.002529	-0.002132	0.001524
3908	0.002452	-0.002135	0.001528
3907	0.002375	-0.002138	0.001531
3906	0.002319	-0.00214	0.001534
3905	0.002303	-0.002142	0.001536
3904	0.002328	-0.002143	0.001539
3903	0.002373	-0.002145	0.00154
3902	0.002412	-0.002146	0.001541
3901	0.002443	-0.002148	0.001541
3900	0.002483	-0.002149	0.00154
3899	0.002541	-0.00215	0.001539
3898	0.0026	-0.002151	0.001537
3897	0.002631	-0.002153	0.001536
3896	0.002626	-0.002154	0.001534
3895	0.002605	-0.002155	0.001532
3894	0.002596	-0.002155	0.00153
3893	0.00261	-0.002156	0.001528
3892	0.002628	-0.002157	0.001526
3891	0.002629	-0.002158	0.001524
3890	0.002609	-0.002159	0.001521
3889	0.002587	-0.00216	0.001519
3888	0.002578	-0.002161	0.001517
3887	0.00259	-0.002162	0.001515
3886	0.002626	-0.002163	0.001513
3885	0.00267	-0.002164	0.001511
3884	0.0027	-0.002166	0.001508
3883	0.0027	-0.002169	0.001504
3882	0.002675	-0.002172	0.001499
3881	0.002645	-0.002176	0.001493
3880	0.002623	-0.00218	0.001486
3879	0.002608	-0.002185	0.00148
3878	0.002594	-0.002189	0.001473
3877	0.002578	-0.002194	0.001466
3876	0.002555	-0.002199	0.001459
3875	0.002533	-0.002204	0.001452
3874	0.002525	-0.002209	0.001445
3873	0.002529	-0.002213	0.001437
3872	0.002518	-0.002218	0.00143
3871	0.002479	-0.002223	0.001422
3870	0.002445	-0.002226	0.001414
3869	0.002455	-0.00223	0.001407
3868	0.002502	-0.002233	0.001401
3867	0.002548	-0.002235	0.001394
3866	0.002568	-0.002238	0.001387
3865	0.00257	-0.00224	0.001381
3864	0.002572	-0.002241	0.001374
3863	0.002574	-0.002243	0.001368
3862	0.002568	-0.002244	0.001362
3861	0.002552	-0.002245	0.001356
3860	0.002518	-0.002245	0.00135
3859	0.002462	-0.002245	0.001344
3858	0.002397	-0.002245	0.001343
3857	0.002353	-0.002245	0.001344
3856	0.002332	-0.002245	0.001345
3855	0.002289	-0.002245	0.001343
3854	0.00224	-0.002245	0.001344
3853	0.002264	-0.002245	0.001349
3852	0.002371	-0.002245	0.001354
3851	0.002504	-0.002245	0.001355
3850	0.002609	-0.002245	0.001354
3849	0.002673	-0.002245	0.001354
3848	0.002708	-0.002245	0.001356
3847	0.002723	-0.002245	0.001359
3846	0.002722	-0.002245	0.00136
3845	0.002703	-0.002245	0.001355
3844	0.002662	-0.002244	0.001346
3843	0.002607	-0.002243	0.001337
3842	0.002547	-0.002241	0.001332
3841	0.002492	-0.002238	0.001329
3840	0.002457	-0.002235	0.001331
3839	0.002458	-0.00223	0.001339
3838	0.002489	-0.002225	0.001352
3837	0.002521	-0.002219	0.001366
3836	0.002537	-0.002213	0.001378
3835	0.002543	-0.002206	0.001384
3834	0.002557	-0.002199	0.001388
3833	0.002588	-0.002191	0.001392
3832	0.002636	-0.002182	0.001399
3831	0.002695	-0.002171	0.00141
3830	0.002756	-0.00216	0.001422
3829	0.002803	-0.002151	0.001432
3828	0.002813	-0.002145	0.001438
3827	0.002783	-0.002141	0.001442
3826	0.002737	-0.002135	0.001447
3825	0.002709	-0.002126	0.001454
3824	0.002709	-0.002118	0.00146
3823	0.002711	-0.002115	0.001465
3822	0.002695	-0.002113	0.00147
3821	0.002675	-0.002105	0.001477
3820	0.002669	-0.002093	0.001484
3819	0.002683	-0.002083	0.001491
3818	0.002705	-0.002082	0.001498
3817	0.002721	-0.002084	0.001505
3816	0.002734	-0.002078	0.001512
3815	0.002748	-0.002067	0.001519
3814	0.002754	-0.002065	0.001525
3813	0.002752	-0.002075	0.001531
3812	0.002752	-0.002083	0.001537
3811	0.002767	-0.002078	0.001543
3810	0.0028	-0.002067	0.001548
3809	0.002831	-0.002066	0.001555
3808	0.002844	-0.002072	0.001561
3807	0.002841	-0.002066	0.001569
3806	0.002837	-0.00204	0.001577
3805	0.002842	-0.002006	0.001586
3804	0.002852	-0.001985	0.001595
3803	0.002855	-0.001971	0.001603
3802	0.00285	-0.001939	0.001612
3801	0.002848	-0.001894	0.001621
3800	0.002854	-0.001864	0.001629
3799	0.002865	-0.00186	0.001637
3798	0.002875	-0.001872	0.001644
3797	0.002883	-0.001879	0.00165
3796	0.002892	-0.001871	0.001655
3795	0.002903	-0.001858	0.001659
3794	0.002916	-0.001851	0.001663
3793	0.002929	-0.001849	0.001666
3792	0.002942	-0.001849	0.001668
3791	0.002952	-0.00185	0.00167
3790	0.002955	-0.001853	0.001673
3789	0.002949	-0.001856	0.001676
3788	0.002937	-0.001858	0.001676
3787	0.002927	-0.001857	0.001673
3786	0.002928	-0.001855	0.001667
3785	0.002939	-0.001852	0.001664
3784	0.002956	-0.001844	0.00167
3783	0.002971	-0.001834	0.001685
3782	0.002971	-0.001828	0.001697
3781	0.002953	-0.001827	0.001697
3780	0.002933	-0.001826	0.001683
3779	0.002935	-0.001821	0.001668
3778	0.00296	-0.001814	0.001662
3777	0.002988	-0.001811	0.001664
3776	0.00299	-0.001812	0.00167
3775	0.002962	-0.001818	0.001674
3774	0.002922	-0.001827	0.00167
3773	0.002886	-0.00184	0.001648
3772	0.002847	-0.001851	0.00161
3771	0.0028	-0.001845	0.001587
3770	0.002758	-0.00182	0.001601
3769	0.002747	-0.001791	0.001642
3768	0.002783	-0.001771	0.001676
3767	0.002855	-0.001763	0.001689
3766	0.00293	-0.001761	0.001694
3765	0.002973	-0.001758	0.001707
3764	0.002971	-0.001754	0.00172
3763	0.002931	-0.001752	0.001718
3762	0.002869	-0.001754	0.001702
3761	0.002812	-0.001753	0.001691
3760	0.002789	-0.001747	0.001686
3759	0.002797	-0.001738	0.00167
3758	0.002811	-0.001726	0.001634
3757	0.002813	-0.001708	0.001597
3756	0.0028	-0.001687	0.001573
3755	0.002766	-0.001667	0.001548
3754	0.002703	-0.001652	0.001507
3753	0.002617	-0.001641	0.001453
3752	0.002544	-0.001631	0.001414
3751	0.002499	-0.001621	0.001416
3750	0.002454	-0.00161	0.001459
3749	0.002389	-0.001592	0.001532
3748	0.00234	-0.001567	0.001612
3747	0.002343	-0.001547	0.001635
3746	0.002376	-0.001538	0.001596
3745	0.002423	-0.001523	0.001595
3744	0.002496	-0.001495	0.001674
3743	0.002571	-0.001466	0.001766
3742	0.002612	-0.001447	0.001819
3741	0.002621	-0.001433	0.001849
3740	0.002638	-0.001412	0.001889
3739	0.002697	-0.001387	0.001936
3738	0.002786	-0.00137	0.001958
3737	0.002859	-0.00136	0.00196
3736	0.002886	-0.001339	0.001981
3735	0.002867	-0.001311	0.002022
3734	0.002818	-0.001298	0.002039
3733	0.002764	-0.001306	0.002015
3732	0.002734	-0.00131	0.001976
3731	0.002748	-0.001284	0.001964
3730	0.002814	-0.00122	0.001997
3729	0.002926	-0.00113	0.002066
3728	0.003061	-0.001033	0.002156
3727	0.003183	-0.000947	0.002244
3726	0.003257	-0.000898	0.002295
3725	0.003269	-0.000902	0.002289
3724	0.003242	-0.000936	0.00225
3723	0.003211	-0.000966	0.002219
3722	0.003192	-0.000983	0.002212
3721	0.003184	-0.000995	0.002217
3720	0.003184	-0.001002	0.00222
3719	0.003195	-0.000985	0.002221
3718	0.003222	-0.000925	0.002239
3717	0.003257	-0.000828	0.002282
3716	0.003284	-0.000731	0.002345
3715	0.003281	-0.00069	0.002398
3714	0.003235	-0.000744	0.00241
3713	0.003164	-0.000875	0.00237
3712	0.003125	-0.000995	0.002312
3711	0.003162	-0.001005	0.00229
3710	0.003265	-0.000886	0.002328
3709	0.00339	-0.000707	0.002398
3708	0.0035	-0.00055	0.002461
3707	0.003583	-0.000449	0.002503
3706	0.003636	-0.000392	0.002537
3705	0.003663	-0.000357	0.002574
3704	0.003666	-0.000324	0.002607
3703	0.003659	-0.000274	0.002632
3702	0.003666	-0.00019	0.002657
3701	0.00371	-8.2e-05	0.002702
3700	0.003791	1.6e-05	0.002771
3699	0.003887	7.7e-05	0.002842
3698	0.003966	0.000105	0.002895
3697	0.004014	0.000135	0.002931
3696	0.004047	0.000187	0.002959
3695	0.004088	0.000262	0.002986
3694	0.004144	0.000368	0.003025
3693	0.004203	0.000516	0.003086
3692	0.004246	0.000682	0.003144
3691	0.004261	0.000811	0.003157
3690	0.004261	0.000909	0.003156
3689	0.004281	0.001044	0.003233
3688	0.004349	0.001248	0.003425
3687	0.004461	0.001472	0.003676
3686	0.004591	0.001642	0.003905
3685	0.004708	0.001733	0.004073
3684	0.004804	0.001777	0.004187
3683	0.004882	0.001814	0.00424
3682	0.004935	0.001864	0.004221
3681	0.004953	0.001976	0.004192
3680	0.004962	0.002208	0.004279
3679	0.005028	0.002517	0.004505
3678	0.005173	0.002749	0.004691
3677	0.005315	0.002897	0.004717
3676	0.005369	0.00316	0.004709
3675	0.005333	0.003566	0.004791
3674	0.005282	0.003947	0.004961
3673	0.005299	0.004162	0.005134
3672	0.005401	0.004184	0.005229
3671	0.005562	0.004189	0.005312
3670	0.005752	0.004359	0.005482
3669	0.005932	0.004659	0.005707
3668	0.006091	0.004965	0.005923
3667	0.006255	0.005229	0.006118
3666	0.006445	0.005487	0.006309
3665	0.006661	0.005784	0.006513
3664	0.006873	0.006117	0.006723
3663	0.007038	0.006428	0.006917
3662	0.007126	0.006668	0.007092
3661	0.007162	0.006846	0.007275
3660	0.007208	0.00701	0.007486
3659	0.007319	0.007182	0.007686
3658	0.007491	0.007383	0.007824
3657	0.007683	0.007667	0.007925
3656	0.007863	0.008052	0.008053
3655	0.008036	0.008491	0.008259
3654	0.008235	0.00894	0.008563
3653	0.00848	0.009372	0.008941
3652	0.00876	0.009799	0.009349
3651	0.009041	0.010276	0.00977
3650	0.009293	0.010809	0.010171
3649	0.0095	0.011315	0.010498
3648	0.009676	0.011748	0.010758
3647	0.009852	0.012148	0.011009
3646	0.010047	0.012543	0.011293
3645	0.010265	0.012911	0.011597
3644	0.010495	0.013228	0.011888
3643	0.010728	0.013515	0.01215
3642	0.010962	0.013827	0.012387
3641	0.011193	0.014198	0.012609
3640	0.011411	0.014625	0.012837
3639	0.011619	0.015102	0.01311
3638	0.011845	0.015616	0.013446
3637	0.012111	0.016132	0.0138
3636	0.012394	0.016613	0.014102
3635	0.012644	0.017063	0.014345
3634	0.012833	0.017523	0.014607
3633	0.012995	0.018007	0.014964
3632	0.013184	0.018459	0.015392
3631	0.013415	0.018838	0.015794
3630	0.013679	0.019282	0.016186
3629	0.013989	0.019885	0.016608
3628	0.014341	0.020469	0.016996
3627	0.014704	0.020911	0.017318
3626	0.015045	0.021284	0.017606
3625	0.015341	0.021707	0.017888
3624	0.015589	0.022237	0.01817
3623	0.015805	0.022842	0.01844
3622	0.01602	0.023454	0.018691
3621	0.016266	0.024031	0.018961
3620	0.016552	0.024569	0.019307
3619	0.016846	0.025054	0.019719
3618	0.01711	0.025479	0.020125
3617	0.017349	0.025885	0.020482
3616	0.017604	0.026333	0.020802
3615	0.017907	0.026872	0.021129
3614	0.018256	0.027516	0.021507
3613	0.018617	0.028209	0.021928
3612	0.018949	0.028853	0.022338
3611	0.019243	0.029409	0.022689
3610	0.019517	0.029935	0.022995
3609	0.019793	0.030522	0.023315
3608	0.020088	0.031168	0.023689
3607	0.020398	0.03179	0.024101
3606	0.020713	0.032346	0.024524
3605	0.021026	0.032869	0.024941
3604	0.021329	0.033397	0.025339
3603	0.021623	0.033932	0.025704
3602	0.02191	0.034471	0.026045
3601	0.0222	0.035041	0.026388
3600	0.022497	0.035666	0.026736
3599	0.022799	0.036329	0.027063
3598	0.023106	0.036994	0.027354
3597	0.023417	0.037625	0.027629
3596	0.023733	0.038209	0.027931
3595	0.024051	0.038766	0.028294
3594	0.024367	0.039345	0.028717
3593	0.024677	0.039994	0.029184
3592	0.024984	0.040711	0.029673
3591	0.025289	0.041432	0.030141
3590	0.025594	0.042079	0.030542
3589	0.025906	0.042674	0.030885
3588	0.026226	0.04333	0.031242
3587	0.026554	0.04409	0.031658
3586	0.026883	0.044874	0.032108
3585	0.027207	0.045594	0.032552
3584	0.027525	0.046223	0.032974
3583	0.02784	0.046787	0.033377
3582	0.028157	0.04733	0.033773
3581	0.028478	0.047896	0.034182
3580	0.028802	0.048509	0.034617
3579	0.029125	0.049161	0.035075
3578	0.029445	0.049836	0.035539
3577	0.029763	0.050535	0.035998
3576	0.030083	0.051285	0.036451
3575	0.03041	0.052092	0.036897
3574	0.030746	0.052913	0.03733
3573	0.031081	0.053682	0.037745
3572	0.031407	0.054366	0.038153
3571	0.031723	0.054991	0.038576
3570	0.032036	0.055609	0.03903
3569	0.032358	0.056283	0.039532
3568	0.032699	0.057046	0.040078
3567	0.033054	0.057858	0.040605
3566	0.033413	0.058654	0.041048
3565	0.033768	0.059437	0.041428
3564	0.034119	0.060235	0.041819
3563	0.034465	0.061036	0.042258
3562	0.034801	0.061794	0.042729
3561	0.035123	0.062491	0.043196
3560	0.03544	0.063162	0.043637
3559	0.035763	0.063857	0.044049
3558	0.036099	0.064589	0.044432
3557	0.036444	0.065328	0.044798
3556	0.036792	0.066038	0.045164
3555	0.037137	0.066711	0.045555
3554	0.037479	0.067373	0.045991
3553	0.03782	0.068063	0.046484
3552	0.038163	0.068809	0.047035
3551	0.038507	0.069616	0.047629
3550	0.038849	0.07047	0.048248
3549	0.03919	0.071348	0.04886
3548	0.039535	0.072217	0.049434
3547	0.039888	0.073056	0.049951
3546	0.040251	0.073859	0.050418
3545	0.040615	0.07464	0.050859
3544	0.040972	0.075407	0.051285
3543	0.041319	0.076158	0.051691
3542	0.04166	0.076891	0.052078
3541	0.042001	0.077614	0.052463
3540	0.042342	0.078348	0.052872
3539	0.042684	0.079099	0.053308
3538	0.043028	0.079856	0.053756
3537	0.043375	0.080595	0.054198
3536	0.043724	0.081302	0.054632
3535	0.04407	0.081998	0.055063
3534	0.044409	0.082716	0.055497
3533	0.044739	0.083481	0.055931
3532	0.045066	0.084285	0.056373
3531	0.0454	0.085098	0.056828
3530	0.045749	0.085889	0.057299
3529	0.04611	0.086654	0.057779
3528	0.046477	0.087419	0.058262
3527	0.046845	0.08821	0.058751
3526	0.047211	0.089033	0.059247
3525	0.047576	0.089866	0.059735
3524	0.047935	0.090672	0.060199
3523	0.048284	0.091438	0.060634
3522	0.048624	0.092178	0.061059
3521	0.048963	0.092913	0.061499
3520	0.049309	0.093653	0.061961
3519	0.049665	0.094393	0.062431
3518	0.05003	0.095134	0.06289
3517	0.050399	0.095882	0.06333
3516	0.050767	0.09664	0.063758
3515	0.051125	0.097405	0.064191
3514	0.051472	0.098173	0.06464
3513	0.051809	0.098949	0.065106
3512	0.052148	0.099738	0.065584
3511	0.052499	0.100533	0.066059
3510	0.052859	0.101318	0.066519
3509	0.053213	0.102082	0.06696
3508	0.053552	0.102832	0.067388
3507	0.053878	0.103588	0.067821
3506	0.054205	0.104364	0.068271
3505	0.054547	0.105153	0.068732
3504	0.054907	0.105935	0.069187
3503	0.05528	0.106696	0.069627
3502	0.055654	0.107446	0.070056
3501	0.056019	0.108202	0.070487
3500	0.056369	0.108971	0.070928
3499	0.056704	0.109748	0.071373
3498	0.057035	0.11052	0.071813
3497	0.057374	0.111276	0.072242
3496	0.057727	0.112015	0.072662
3495	0.058089	0.112746	0.073087
3494	0.058454	0.113483	0.073527
3493	0.058815	0.114237	0.073983
3492	0.059174	0.115007	0.074448
3491	0.059534	0.115786	0.074908
3490	0.059897	0.116566	0.075359
3489	0.060258	0.117348	0.075797
3488	0.060604	0.118133	0.076224
3487	0.06093	0.118919	0.076647
3486	0.061242	0.119702	0.077073
3485	0.061562	0.120478	0.077508
3484	0.061906	0.121248	0.077952
3483	0.062277	0.122014	0.078404
3482	0.062663	0.122776	0.078857
3481	0.063048	0.123535	0.079306
3480	0.063431	0.124294	0.079751
3479	0.06382	0.125058	0.0802
3478	0.064219	0.125828	0.080657
3477	0.064617	0.126599	0.081118
3476	0.064997	0.127361	0.081568
3475	0.06535	0.128115	0.081997
3474	0.065687	0.128866	0.082409
3473	0.066029	0.129621	0.082816
3472	0.066388	0.130382	0.083226
3471	0.066759	0.131148	0.083643
3470	0.067132	0.131913	0.084067
3469	0.067497	0.132675	0.084496
3468	0.06786	0.133431	0.084926
3467	0.068228	0.134184	0.085354
3466	0.068608	0.134937	0.085783
3465	0.068997	0.135692	0.086218
3464	0.069384	0.136451	0.086657
3463	0.069762	0.137214	0.087093
3462	0.070133	0.137979	0.087518
3461	0.070501	0.138743	0.087932
3460	0.070869	0.139502	0.08834
3459	0.071234	0.140254	0.088754
3458	0.071596	0.141003	0.089177
3457	0.07196	0.141758	0.08961
3456	0.072329	0.14252	0.090045
3455	0.072703	0.143276	0.090472
3454	0.07308	0.144014	0.090889
3453	0.073458	0.144741	0.091306
3452	0.073836	0.14548	0.091735
3451	0.07421	0.146246	0.092178
3450	0.07457	0.147021	0.092618
3449	0.074915	0.147768	0.093034
3448	0.075256	0.148476	0.093423
3447	0.075616	0.149179	0.093806
3446	0.076005	0.149914	0.094208
3445	0.076411	0.150672	0.094631
3444	0.076806	0.151408	0.095055
3443	0.07717	0.152103	0.09546
3442	0.077515	0.152792	0.095852
3441	0.077876	0.153525	0.096253
3440	0.078276	0.154308	0.096675
3439	0.078702	0.155098	0.097103
3438	0.079116	0.155845	0.097511
3437	0.079487	0.156552	0.097885
3436	0.079819	0.157271	0.098238
3435	0.08014	0.158058	0.098601
3434	0.080469	0.158918	0.098991
3433	0.080805	0.159795	0.099407
3432	0.08114	0.160617	0.09983
3431	0.081478	0.161353	0.10025
3430	0.081834	0.162034	0.100675
3429	0.082216	0.162713	0.101122
3428	0.082611	0.163417	0.101586
3427	0.082996	0.164132	0.102033
3426	0.083356	0.164825	0.102429
3425	0.083701	0.165489	0.102783
3424	0.084041	0.166151	0.103141
3423	0.084377	0.16684	0.103539
3422	0.084692	0.167553	0.103958
3421	0.084984	0.16825	0.104357
3420	0.085276	0.168905	0.104729
3419	0.085601	0.169533	0.105118
3418	0.085971	0.170167	0.105553
3417	0.086373	0.170832	0.105997
3416	0.086783	0.171529	0.106385
3415	0.087179	0.172257	0.106697
3414	0.087543	0.173006	0.106985
3413	0.08786	0.173752	0.107318
3412	0.088132	0.174464	0.10771
3411	0.088377	0.175122	0.108119
3410	0.08862	0.175739	0.108493
3409	0.088895	0.176336	0.108815
3408	0.089235	0.176926	0.109106
3407	0.089647	0.177501	0.109403
3406	0.090086	0.178054	0.109722
3405	0.090477	0.178604	0.11005
3404	0.090772	0.179199	0.110371
3403	0.090984	0.179879	0.110679
3402	0.091167	0.18063	0.110985
3401	0.091356	0.181376	0.111293
3400	0.091554	0.182047	0.111601
3399	0.09175	0.182628	0.111914
3398	0.09194	0.183164	0.112242
3397	0.092129	0.183711	0.112588
3396	0.092325	0.18429	0.112941
3395	0.092542	0.184876	0.113273
3394	0.092791	0.185415	0.113569
3393	0.09307	0.185867	0.113832
3392	0.093366	0.186261	0.11409
3391	0.093654	0.186689	0.114377
3390	0.093914	0.187229	0.114697
3389	0.094133	0.187863	0.11502
3388	0.094312	0.188494	0.115307
3387	0.094467	0.189041	0.115554
3386	0.09461	0.189507	0.1158
3385	0.094744	0.189957	0.116084
3384	0.094868	0.190451	0.116403
3383	0.095	0.190991	0.116722
3382	0.095173	0.191539	0.117006
3381	0.095404	0.192044	0.11724
3380	0.095668	0.192468	0.117435
3379	0.095914	0.192818	0.117624
3378	0.096104	0.193145	0.11785
3377	0.096257	0.193531	0.118146
3376	0.09643	0.194036	0.118505
3375	0.096677	0.194659	0.118891
3374	0.096992	0.195347	0.119263
3373	0.097315	0.196027	0.1196
3372	0.097596	0.196645	0.119906
3371	0.097847	0.197178	0.120192
3370	0.098116	0.197634	0.120466
3369	0.098424	0.198046	0.120728
3368	0.098727	0.19845	0.120985
3367	0.09897	0.198852	0.121249
3366	0.099149	0.199238	0.121528
3365	0.099314	0.199611	0.121815
3364	0.099499	0.200016	0.122101
3363	0.099679	0.200486	0.122382
3362	0.099799	0.200984	0.122673
3361	0.099843	0.201429	0.122979
3360	0.099855	0.20179	0.123283
3359	0.099908	0.202125	0.123558
3358	0.100048	0.202523	0.123784
3357	0.100277	0.203014	0.123962
3356	0.100566	0.203563	0.124114
3355	0.100867	0.204118	0.124269
3354	0.101145	0.20464	0.12445
3353	0.101402	0.205114	0.124679
3352	0.101673	0.205537	0.124977
3351	0.101984	0.20592	0.125345
3350	0.102315	0.20628	0.125746
3349	0.1026	0.20663	0.126108
3348	0.102787	0.206987	0.126386
3347	0.102871	0.207372	0.126593
3346	0.102893	0.207786	0.126777
3345	0.102916	0.208203	0.126969
3344	0.102988	0.208586	0.127161
3343	0.103125	0.208922	0.12734
3342	0.103305	0.209236	0.127503
3341	0.103487	0.209572	0.127656
3340	0.10365	0.209961	0.127795
3339	0.103804	0.210391	0.127935
3338	0.10396	0.21081	0.128111
3337	0.104098	0.21116	0.128342
3336	0.104172	0.211423	0.128598
3335	0.104149	0.211626	0.128833
3334	0.104036	0.211812	0.129036
3333	0.10387	0.212023	0.129246
3332	0.103697	0.212299	0.129489
3331	0.103537	0.21266	0.129726
3330	0.103391	0.213073	0.129897
3329	0.103262	0.21346	0.129991
3328	0.103156	0.213747	0.130072
3327	0.103057	0.213907	0.130204
3326	0.10292	0.213974	0.130377
3325	0.102708	0.214032	0.130539
3324	0.102439	0.214188	0.130678
3323	0.102164	0.214494	0.130843
3322	0.101898	0.21488	0.131052
3321	0.101617	0.215194	0.131239
3320	0.101314	0.215341	0.131321
3319	0.101035	0.215378	0.131306
3318	0.100834	0.215441	0.131295
3317	0.100705	0.215609	0.131365
3316	0.100592	0.215848	0.131497
3315	0.100451	0.216091	0.131627
3314	0.100288	0.216321	0.131743
3313	0.100136	0.21658	0.131886
3312	0.100004	0.21691	0.132076
3311	0.09988	0.217291	0.132271
3310	0.09976	0.217645	0.132411
3309	0.099654	0.217901	0.132488
3308	0.099568	0.218068	0.132555
3307	0.099498	0.218223	0.13268
3306	0.099433	0.218429	0.132878
3305	0.099374	0.218677	0.133111
3304	0.099322	0.218907	0.13332
3303	0.099249	0.219069	0.133469
3302	0.099111	0.219155	0.133567
3301	0.098905	0.219208	0.133643
3300	0.098696	0.219301	0.133716
3299	0.09856	0.219485	0.133791
3298	0.098499	0.219741	0.13388
3297	0.09845	0.220004	0.134018
3296	0.098366	0.220239	0.134237
3295	0.098271	0.220465	0.134495
3294	0.098206	0.220684	0.134679
3293	0.098171	0.220859	0.134695
3292	0.098126	0.220967	0.134572
3291	0.098045	0.22104	0.134444
3290	0.09793	0.221116	0.134428
3289	0.097783	0.221186	0.134519
3288	0.097606	0.221229	0.134647
3287	0.097411	0.221262	0.134764
3286	0.097222	0.221304	0.134856
3285	0.097038	0.221311	0.134886
3284	0.096829	0.221204	0.134801
3283	0.096581	0.220961	0.1346
3282	0.096316	0.220672	0.134367
3281	0.096065	0.220463	0.134207
3280	0.095835	0.220409	0.134153
3279	0.095606	0.220477	0.134156
3278	0.095371	0.220563	0.134146
3277	0.095143	0.220552	0.134077
3276	0.094939	0.220392	0.133948
3275	0.094757	0.220116	0.133793
3274	0.094578	0.219796	0.133655
3273	0.094372	0.219484	0.133544
3272	0.094106	0.21918	0.133418
3271	0.093764	0.21886	0.133221
3270	0.093373	0.218525	0.132934
3269	0.092998	0.218222	0.132593
3268	0.092687	0.218003	0.132247
3267	0.092413	0.217854	0.131918
3266	0.092099	0.217685	0.131603
3265	0.091694	0.2174	0.131299
3264	0.091219	0.216995	0.131009
3263	0.090739	0.216556	0.130729
3262	0.090298	0.21616	0.13044
3261	0.089901	0.21581	0.130114
3260	0.08953	0.215451	0.129726
3259	0.08916	0.215026	0.12926
3258	0.088756	0.214513	0.128724
3257	0.088291	0.213923	0.12817
3256	0.087772	0.213308	0.127688
3255	0.087258	0.212725	0.127339
3254	0.086819	0.2122	0.127092
3253	0.086482	0.211725	0.126846
3252	0.086211	0.211287	0.126521
3251	0.085926	0.210871	0.126119
3250	0.08556	0.210443	0.125685
3249	0.085095	0.20997	0.125244
3248	0.084574	0.209462	0.124782
3247	0.084064	0.208955	0.1243
3246	0.083614	0.208455	0.123841
3245	0.083236	0.20791	0.123454
3244	0.082908	0.20728	0.123144
3243	0.082587	0.206589	0.122856
3242	0.082236	0.205897	0.122532
3241	0.081846	0.205249	0.122149
3240	0.081435	0.204658	0.121741
3239	0.081033	0.204111	0.121358
3238	0.080651	0.203589	0.121018
3237	0.080282	0.203083	0.120694
3236	0.079921	0.202613	0.120344
3235	0.079561	0.202201	0.119946
3234	0.079194	0.201813	0.119503
3233	0.078818	0.201365	0.11904
3232	0.078451	0.200802	0.118595
3231	0.078116	0.200148	0.118215
3230	0.077802	0.199472	0.117915
3229	0.077468	0.198811	0.117649
3228	0.077085	0.198163	0.117335
3227	0.076663	0.197515	0.116929
3226	0.076238	0.196865	0.116465
3225	0.075838	0.196226	0.116015
3224	0.075464	0.195615	0.115628
3223	0.075108	0.195037	0.115293
3222	0.074757	0.194468	0.114966
3221	0.074406	0.193874	0.114611
3220	0.074056	0.193257	0.114223
3219	0.073704	0.192669	0.11382
3218	0.07335	0.192145	0.113417
3217	0.072991	0.191648	0.113015
3216	0.072629	0.191089	0.112603
3215	0.072272	0.190402	0.112168
3214	0.07192	0.189605	0.111708
3213	0.071567	0.188784	0.11123
3212	0.071205	0.188042	0.110754
3211	0.070832	0.187418	0.110306
3210	0.070452	0.18686	0.109893
3209	0.070068	0.186254	0.109493
3208	0.069688	0.185542	0.109075
3207	0.069328	0.184774	0.108641
3206	0.068998	0.184054	0.10823
3205	0.068692	0.18342	0.107867
3204	0.068385	0.18281	0.107528
3203	0.068055	0.182141	0.107165
3202	0.067703	0.181398	0.106767
3201	0.067345	0.180628	0.106365
3200	0.066996	0.179859	0.105983
3199	0.066651	0.179065	0.105599
3198	0.066301	0.178224	0.105169
3197	0.06594	0.177381	0.104679
3196	0.065572	0.176615	0.104151
3195	0.065208	0.175942	0.103622
3194	0.064854	0.175287	0.103117
3193	0.064511	0.174569	0.102649
3192	0.064173	0.17378	0.102224
3191	0.063831	0.172976	0.101829
3190	0.063482	0.172189	0.101429
3189	0.063129	0.171403	0.10099
3188	0.062779	0.170586	0.100502
3187	0.062434	0.169731	0.099987
3186	0.062097	0.168855	0.099475
3185	0.061771	0.167982	0.098976
3184	0.061451	0.167131	0.098486
3183	0.061129	0.1663	0.09801
3182	0.060795	0.165473	0.097558
3181	0.060444	0.164637	0.097128
3180	0.060081	0.163801	0.096689
3179	0.05971	0.162984	0.096221
3178	0.059336	0.162186	0.095734
3177	0.058969	0.161401	0.095256
3176	0.058621	0.160634	0.094802
3175	0.0583	0.159886	0.094355
3174	0.058002	0.159126	0.093893
3173	0.057708	0.158306	0.093407
3172	0.057398	0.157417	0.09291
3171	0.057067	0.156497	0.092424
3170	0.056732	0.155592	0.091964
3169	0.05641	0.154719	0.091527
3168	0.056103	0.153877	0.09109
3167	0.055797	0.153061	0.090628
3166	0.055481	0.152256	0.090142
3165	0.055152	0.151434	0.089655
3164	0.054813	0.150581	0.089191
3163	0.054458	0.149719	0.088759
3162	0.054093	0.14888	0.088351
3161	0.053742	0.148076	0.087949
3160	0.053427	0.147284	0.087526
3159	0.053132	0.146459	0.087059
3158	0.052814	0.14556	0.086548
3157	0.052447	0.144583	0.08602
3156	0.052056	0.143582	0.085498
3155	0.051687	0.142631	0.084987
3154	0.051366	0.141761	0.084477
3153	0.051084	0.140939	0.083972
3152	0.050827	0.14012	0.083491
3151	0.050593	0.139283	0.083051
3150	0.050375	0.138435	0.082654
3149	0.050138	0.137585	0.082279
3148	0.049849	0.136758	0.081902
3147	0.049511	0.135993	0.081508
3146	0.049166	0.135307	0.0811
3145	0.04885	0.134667	0.080686
3144	0.04856	0.134007	0.080257
3143	0.048273	0.133287	0.07979
3142	0.047984	0.132513	0.079277
3141	0.04771	0.131706	0.078748
3140	0.047466	0.13089	0.078249
3139	0.047241	0.130081	0.077808
3138	0.047007	0.129271	0.077414
3137	0.046732	0.128428	0.077029
3136	0.046411	0.127525	0.076612
3135	0.046064	0.126585	0.076156
3134	0.045724	0.125658	0.075685
3133	0.045415	0.124777	0.075233
3132	0.045132	0.123944	0.074818
3131	0.044872	0.123157	0.074437
3130	0.044641	0.122428	0.074082
3129	0.044443	0.121745	0.073748
3128	0.044248	0.121058	0.073415
3127	0.044013	0.120315	0.073054
3126	0.043725	0.119523	0.072649
3125	0.043422	0.11874	0.072219
3124	0.043159	0.118012	0.071804
3123	0.042948	0.117329	0.071411
3122	0.042747	0.116635	0.071012
3121	0.042509	0.115892	0.07059
3120	0.042227	0.115118	0.070171
3119	0.041952	0.114374	0.069817
3118	0.041734	0.113711	0.069551
3117	0.041576	0.113121	0.069324
3116	0.041431	0.112546	0.069054
3115	0.041253	0.111922	0.068701
3114	0.041041	0.111231	0.068304
3113	0.040821	0.110496	0.067934
3112	0.040609	0.109766	0.067639
3111	0.040411	0.109091	0.067423
3110	0.040229	0.108504	0.067256
3109	0.040057	0.107991	0.067081
3108	0.039869	0.107487	0.066842
3107	0.039626	0.106908	0.066528
3106	0.039319	0.10621	0.066179
3105	0.03898	0.105426	0.065844
3104	0.038659	0.104642	0.065528
3103	0.038394	0.103938	0.065204
3102	0.038198	0.103339	0.064868
3101	0.038049	0.102803	0.064556
3100	0.037903	0.102266	0.064295
3099	0.037725	0.101698	0.064069
3098	0.037525	0.101115	0.063844
3097	0.037345	0.100547	0.06361
3096	0.037207	0.100003	0.063386
3095	0.037095	0.099481	0.063188
3094	0.036986	0.098986	0.063008
3093	0.036875	0.098527	0.062815
3092	0.036767	0.098094	0.062587
3091	0.036654	0.097648	0.062338
3090	0.036518	0.097141	0.062111
3089	0.036348	0.096545	0.061929
3088	0.036151	0.095867	0.061754
3087	0.035942	0.095149	0.061523
3086	0.035742	0.094454	0.061219
3085	0.035561	0.093827	0.060883
3084	0.035383	0.093263	0.060561
3083	0.035182	0.092715	0.060267
3082	0.034957	0.092143	0.059998
3081	0.03474	0.091549	0.059761
3080	0.034559	0.090968	0.059553
3079	0.034406	0.09042	0.059344
3078	0.034246	0.089902	0.059107
3077	0.03406	0.089398	0.058848
3076	0.033863	0.088896	0.058598
3075	0.033678	0.088381	0.058367
3074	0.033514	0.087832	0.058133
3073	0.033361	0.087242	0.057869
3072	0.033203	0.086625	0.057567
3071	0.033035	0.086013	0.057233
3070	0.032877	0.085438	0.05689
3069	0.032755	0.08491	0.056578
3068	0.03267	0.084411	0.056332
3067	0.032582	0.083902	0.056145
3066	0.032444	0.083347	0.055962
3065	0.032246	0.082752	0.055728
3064	0.032023	0.082173	0.055431
3063	0.031818	0.081657	0.055099
3062	0.031649	0.081194	0.054761
3061	0.031505	0.080713	0.054422
3060	0.031364	0.080154	0.054076
3059	0.031221	0.079518	0.053731
3058	0.031076	0.078851	0.053407
3057	0.030922	0.078188	0.05311
3056	0.030746	0.077537	0.052809
3055	0.030549	0.076908	0.052473
3054	0.030359	0.076319	0.052101
3053	0.030202	0.075771	0.051733
3052	0.030067	0.07523	0.051407
3051	0.029922	0.074653	0.051141
3050	0.029751	0.074035	0.050925
3049	0.029579	0.073396	0.050721
3048	0.029432	0.072753	0.050471
3047	0.029299	0.072115	0.050139
3046	0.02915	0.0715	0.049746
3045	0.028972	0.070941	0.049359
3044	0.028773	0.070455	0.049025
3043	0.028571	0.070021	0.048735
3042	0.028392	0.069596	0.048456
3041	0.028271	0.069135	0.048175
3040	0.028224	0.068601	0.047901
3039	0.028225	0.067979	0.047631
3038	0.028215	0.067295	0.04736
3037	0.028158	0.066623	0.047096
3036	0.028065	0.066047	0.046865
3035	0.027963	0.065608	0.046681
3034	0.027861	0.065273	0.046528
3033	0.027754	0.06496	0.046375
3032	0.027648	0.064603	0.046199
3031	0.027577	0.064195	0.046005
3030	0.027567	0.063777	0.045811
3029	0.027596	0.063374	0.045629
3028	0.02761	0.062968	0.045444
3027	0.027574	0.06253	0.045236
3026	0.027505	0.062059	0.045013
3025	0.027441	0.061587	0.04482
3024	0.027397	0.061154	0.044708
3023	0.027369	0.060776	0.044681
3022	0.02735	0.060442	0.044676
3021	0.027324	0.060101	0.044606
3020	0.027254	0.059699	0.044423
3019	0.027123	0.059233	0.044164
3018	0.026975	0.058773	0.043923
3017	0.026892	0.058406	0.043783
3016	0.026902	0.058147	0.043747
3015	0.02696	0.057931	0.043751
3014	0.027006	0.057681	0.043715
3013	0.027036	0.057373	0.043602
3012	0.027076	0.057039	0.043423
3011	0.027145	0.056735	0.043239
3010	0.027246	0.056516	0.043131
3009	0.027385	0.056408	0.043155
3008	0.027553	0.05638	0.043296
3007	0.027704	0.056348	0.043465
3006	0.027777	0.056226	0.043567
3005	0.027756	0.055985	0.04356
3004	0.027684	0.055673	0.04348
3003	0.027634	0.055384	0.043395
3002	0.027648	0.055188	0.043341
3001	0.027711	0.055084	0.043297
3000	0.02777	0.055019	0.043207
2999	0.027779	0.054942	0.043054
2998	0.027745	0.054859	0.042893
2997	0.027717	0.054809	0.042805
2996	0.027737	0.054821	0.042818
2995	0.027796	0.054877	0.042893
2994	0.027851	0.054927	0.042969
2993	0.027868	0.054924	0.043022
2992	0.02786	0.054875	0.043082
2991	0.027886	0.054863	0.043216
2990	0.028021	0.055009	0.043495
2989	0.0283	0.055363	0.043946
2988	0.028674	0.055843	0.044502
2987	0.029037	0.056303	0.045034
2986	0.029318	0.056657	0.045439
2985	0.029534	0.056934	0.045725
2984	0.029761	0.057216	0.045991
2983	0.030052	0.057561	0.046337
2982	0.030412	0.057986	0.0468
2981	0.030821	0.058477	0.047352
2980	0.031255	0.059011	0.047944
2979	0.031705	0.05957	0.048554
2978	0.032175	0.060155	0.049197
2977	0.032693	0.060781	0.049905
2976	0.033286	0.061444	0.0507
2975	0.03395	0.062113	0.051576
2974	0.034657	0.062759	0.052504
2973	0.035375	0.063374	0.053447
2972	0.036091	0.063973	0.054387
2971	0.036813	0.064584	0.055332
2970	0.03757	0.065249	0.056304
2969	0.038409	0.066002	0.057323
2968	0.039367	0.06685	0.058386
2967	0.040414	0.067757	0.059479
2966	0.041458	0.068664	0.060588
2965	0.042414	0.069508	0.061691
2964	0.043284	0.070262	0.062763
2963	0.044151	0.070947	0.063796
2962	0.045101	0.071619	0.06481
2961	0.046151	0.07231	0.065817
2960	0.047232	0.072997	0.06678
2959	0.048235	0.073631	0.067633
2958	0.049067	0.074206	0.068342
2957	0.04971	0.074757	0.068931
2956	0.050233	0.07532	0.069449
2955	0.050743	0.075882	0.069917
2954	0.051296	0.076412	0.070334
2953	0.051857	0.076902	0.070705
2952	0.052357	0.077381	0.071057
2951	0.052783	0.077886	0.071431
2950	0.053199	0.078441	0.071877
2949	0.053708	0.079066	0.07245
2948	0.054394	0.079792	0.07321
2947	0.055299	0.080665	0.074195
2946	0.056417	0.081709	0.075411
2945	0.057689	0.082891	0.076822
2944	0.059037	0.084128	0.078369
2943	0.06042	0.085347	0.079995
2942	0.061886	0.086538	0.081684
2941	0.063526	0.087747	0.083458
2940	0.065382	0.089023	0.085354
2939	0.067402	0.090378	0.087377
2938	0.069487	0.091789	0.089493
2937	0.071587	0.093214	0.091666
2936	0.073717	0.094609	0.093892
2935	0.075903	0.095945	0.096183
2934	0.078131	0.097225	0.098522
2933	0.080365	0.098476	0.10085
2932	0.08258	0.099718	0.103114
2931	0.084776	0.100942	0.1053
2930	0.086945	0.102124	0.107421
2929	0.089062	0.103238	0.10948
2928	0.091095	0.104265	0.111433
2927	0.093002	0.105173	0.113191
2926	0.094728	0.105926	0.114657
2925	0.096221	0.106495	0.115761
2924	0.097447	0.106868	0.116481
2923	0.098366	0.107035	0.116815
2922	0.098909	0.106989	0.116755
2921	0.098995	0.106724	0.116294
2920	0.098589	0.106225	0.115425
2919	0.097714	0.105463	0.114118
2918	0.096414	0.104406	0.112323
2917	0.094711	0.103047	0.110032
2916	0.09263	0.101438	0.107346
2915	0.090235	0.099672	0.104435
2914	0.087646	0.097856	0.101437
2913	0.085024	0.096077	0.098436
2912	0.082522	0.094384	0.095525
2911	0.080249	0.092807	0.092839
2910	0.078251	0.091375	0.090487
2909	0.076515	0.090112	0.088469
2908	0.074982	0.089009	0.086691
2907	0.073577	0.088017	0.085069
2906	0.072237	0.087089	0.083578
2905	0.070955	0.086217	0.082207
2904	0.069777	0.085421	0.08092
2903	0.068756	0.084701	0.07969
2902	0.067895	0.08403	0.078538
2901	0.067128	0.083372	0.077495
2900	0.066366	0.082708	0.076532
2899	0.065547	0.082041	0.075579
2898	0.064672	0.081382	0.074601
2897	0.063779	0.080742	0.073627
2896	0.062903	0.080114	0.072695
2895	0.062055	0.079486	0.071794
2894	0.061236	0.078858	0.070889
2893	0.060459	0.078265	0.069984
2892	0.059736	0.077757	0.069137
2891	0.059055	0.077351	0.068404
2890	0.05839	0.077005	0.06778
2889	0.057722	0.07665	0.067193
2888	0.05705	0.076245	0.066553
2887	0.056379	0.075797	0.065834
2886	0.055714	0.075338	0.065098
2885	0.055071	0.074885	0.064454
2884	0.054475	0.074429	0.063971
2883	0.053958	0.073968	0.063645
2882	0.05354	0.07352	0.06343
2881	0.053233	0.073106	0.063271
2880	0.053037	0.072731	0.063134
2879	0.05295	0.072401	0.063021
2878	0.052975	0.072144	0.062977
2877	0.053112	0.071998	0.063045
2876	0.053336	0.071953	0.063209
2875	0.053583	0.071934	0.063395
2874	0.053782	0.071849	0.063535
2873	0.053897	0.071644	0.063615
2872	0.053948	0.071316	0.063656
2871	0.053974	0.070901	0.063664
2870	0.054	0.070437	0.063637
2869	0.054038	0.069961	0.063588
2868	0.054122	0.069501	0.063563
2867	0.054316	0.069091	0.063625
2866	0.054691	0.068783	0.063848
2865	0.055291	0.068623	0.064308
2864	0.056119	0.068633	0.065065
2863	0.057171	0.0688	0.066142
2862	0.058444	0.06911	0.067508
2861	0.059936	0.069553	0.069087
2860	0.061607	0.070096	0.07079
2859	0.063382	0.070683	0.072547
2858	0.06518	0.071271	0.074329
2857	0.066926	0.071861	0.076113
2856	0.068544	0.072459	0.077823
2855	0.069916	0.073016	0.079303
2854	0.070876	0.073424	0.08034
2853	0.071257	0.073551	0.080742
2852	0.070934	0.073288	0.08039
2851	0.069839	0.072566	0.07925
2850	0.067973	0.071369	0.077358
2849	0.065417	0.069747	0.074803
2848	0.062355	0.067812	0.071729
2847	0.059039	0.065693	0.068346
2846	0.055719	0.063504	0.064909
2845	0.052584	0.061342	0.061653
2844	0.049722	0.059288	0.05871
2843	0.04714	0.057406	0.056094
2842	0.044821	0.055733	0.053768
2841	0.042771	0.054268	0.051706
2840	0.041007	0.052978	0.049893
2839	0.039514	0.051822	0.048301
2838	0.038233	0.050777	0.046889
2837	0.037089	0.049832	0.045623
2836	0.036031	0.048974	0.044478
2835	0.035043	0.048178	0.04343
2834	0.034131	0.047424	0.042459
2833	0.033308	0.046703	0.041554
2832	0.032578	0.04601	0.040708
2831	0.031927	0.045331	0.039907
2830	0.031328	0.044659	0.039147
2829	0.030758	0.044003	0.038437
2828	0.03021	0.043378	0.037791
2827	0.029678	0.042799	0.037206
2826	0.029153	0.04228	0.036675
2825	0.028646	0.041825	0.036195
2824	0.028185	0.041405	0.035754
2823	0.027784	0.040968	0.03532
2822	0.027409	0.040486	0.034854
2821	0.027012	0.039977	0.034352
2820	0.026589	0.039487	0.033863
2819	0.026207	0.039045	0.033448
2818	0.025927	0.038652	0.033129
2817	0.025728	0.038291	0.032866
2816	0.02553	0.037941	0.032587
2815	0.025276	0.037585	0.032246
2814	0.024979	0.037228	0.031858
2813	0.024677	0.036893	0.031466
2812	0.024386	0.036594	0.031092
2811	0.024097	0.036316	0.030734
2810	0.023818	0.036027	0.030395
2809	0.023558	0.035707	0.030102
2808	0.023316	0.035365	0.029873
2807	0.023077	0.035022	0.029692
2806	0.022833	0.034692	0.029519
2805	0.022584	0.034378	0.02932
2804	0.022345	0.034078	0.029086
2803	0.022144	0.033799	0.028822
2802	0.022005	0.033552	0.02854
2801	0.021908	0.033336	0.028258
2800	0.021786	0.033122	0.027991
2799	0.021586	0.032871	0.027749
2798	0.02133	0.032569	0.027539
2797	0.021084	0.032245	0.027356
2796	0.020888	0.031937	0.027175
2795	0.020726	0.031655	0.026967
2794	0.020575	0.03139	0.026727
2793	0.020433	0.031142	0.026488
2792	0.020315	0.03094	0.026302
2791	0.020233	0.030801	0.0262
2790	0.020189	0.030702	0.026158
2789	0.020161	0.030585	0.026102
2788	0.020105	0.03041	0.02596
2787	0.019991	0.03018	0.025727
2786	0.019843	0.029934	0.025471
2785	0.019723	0.02971	0.025272
2784	0.019666	0.029529	0.025159
2783	0.019643	0.029395	0.0251
2782	0.019607	0.029289	0.025047
2781	0.019532	0.029171	0.024968
2780	0.019433	0.029001	0.024857
2779	0.019338	0.028787	0.024722
2778	0.019265	0.028566	0.024572
2777	0.019207	0.028365	0.024415
2776	0.019136	0.028177	0.024257
2775	0.019033	0.027992	0.024115
2774	0.01891	0.027828	0.024
2773	0.018799	0.027698	0.0239
2772	0.018712	0.027581	0.023788
2771	0.01863	0.027438	0.023654
2770	0.018525	0.027254	0.023519
2769	0.018401	0.027055	0.023407
2768	0.018284	0.026879	0.023315
2767	0.0182	0.026743	0.023232
2766	0.018154	0.026633	0.023145
2765	0.018125	0.026519	0.023042
2764	0.018093	0.026386	0.022908
2763	0.018053	0.026249	0.022755
2762	0.018015	0.02613	0.022628
2761	0.017976	0.026023	0.022561
2760	0.017911	0.025898	0.022531
2759	0.017805	0.025733	0.022486
2758	0.017681	0.025547	0.0224
2757	0.01759	0.025375	0.022296
2756	0.017553	0.025235	0.022204
2755	0.017544	0.025128	0.022136
2754	0.017523	0.025045	0.022084
2753	0.017479	0.024977	0.022033
2752	0.01743	0.024913	0.021967
2751	0.017399	0.024847	0.021886
2750	0.017384	0.024779	0.021804
2749	0.01736	0.024694	0.021729
2748	0.017308	0.024576	0.021647
2747	0.017234	0.024432	0.021543
2746	0.017157	0.024293	0.021424
2745	0.017091	0.024179	0.021309
2744	0.017035	0.024077	0.021212
2743	0.016988	0.023973	0.021131
2742	0.016958	0.02388	0.021073
2741	0.016945	0.023807	0.021037
2740	0.016932	0.023739	0.021003
2739	0.016897	0.023644	0.020941
2738	0.016839	0.023518	0.020848
2737	0.016772	0.023391	0.020752
2736	0.016714	0.023284	0.020685
2735	0.01667	0.023201	0.02065
2734	0.016637	0.023129	0.020627
2733	0.016607	0.023054	0.020593
2732	0.016574	0.022963	0.020537
2731	0.016535	0.022851	0.020462
2730	0.01649	0.022728	0.02038
2729	0.016442	0.022615	0.0203
2728	0.016395	0.022519	0.020222
2727	0.016351	0.022438	0.020147
2726	0.016312	0.022359	0.020078
2725	0.016273	0.022274	0.020015
2724	0.016229	0.022178	0.019955
2723	0.016175	0.022076	0.019891
2722	0.016118	0.021972	0.019821
2721	0.016065	0.021874	0.019749
2720	0.016019	0.021782	0.019682
2719	0.015978	0.021691	0.01962
2718	0.015937	0.0216	0.019562
2717	0.015894	0.021507	0.019505
2716	0.015849	0.021414	0.019446
2715	0.015801	0.021319	0.019382
2714	0.015752	0.021224	0.019319
2713	0.015705	0.021129	0.019259
2712	0.015663	0.021034	0.019202
2711	0.015623	0.020939	0.019144
2710	0.01558	0.020844	0.019083
2709	0.015533	0.020748	0.019021
2708	0.015483	0.020652	0.018958
2707	0.015436	0.020556	0.018893
2706	0.015394	0.02046	0.018828
2705	0.015358	0.020364	0.018765
2704	0.015324	0.020268	0.018706
2703	0.015286	0.020172	0.018649
2702	0.015241	0.020075	0.01859
2701	0.01519	0.019978	0.018527
2700	0.015139	0.01988	0.018459
2699	0.015094	0.019781	0.018386
2698	0.015057	0.019684	0.018316
2697	0.015028	0.01959	0.018253
2696	0.015002	0.019498	0.018198
2695	0.014969	0.019404	0.018145
2694	0.014928	0.019303	0.018088
2693	0.01488	0.019198	0.01803
2692	0.01483	0.019094	0.017975
2691	0.014784	0.018994	0.017919
2690	0.014743	0.018899	0.017857
2689	0.01471	0.018807	0.017793
2688	0.014685	0.018717	0.017734
2687	0.014665	0.018629	0.017684
2686	0.014647	0.01854	0.017641
2685	0.014625	0.018444	0.017595
2684	0.014597	0.018333	0.017537
2683	0.014563	0.018215	0.017464
2682	0.014529	0.018101	0.017387
2681	0.014496	0.017999	0.017315
2680	0.014458	0.0179	0.01725
2679	0.01441	0.017791	0.017182
2678	0.014358	0.017673	0.017106
2677	0.014312	0.017557	0.017032
2676	0.014276	0.017448	0.016971
2675	0.014248	0.017343	0.016921
2674	0.014226	0.017242	0.016874
2673	0.014211	0.017148	0.016824
2672	0.0142	0.01706	0.01677
2671	0.014185	0.016972	0.016714
2670	0.014162	0.016879	0.016657
2669	0.014135	0.016779	0.016602
2668	0.014112	0.016673	0.016549
2667	0.014096	0.016564	0.016495
2666	0.014087	0.016459	0.016443
2665	0.014081	0.016364	0.016396
2664	0.014072	0.016277	0.016353
2663	0.014054	0.01619	0.016311
2662	0.014028	0.016101	0.016267
2661	0.013999	0.016011	0.016222
2660	0.01397	0.015922	0.016176
2659	0.013941	0.01583	0.016127
2658	0.013916	0.015733	0.016076
2657	0.013897	0.015633	0.016025
2656	0.013883	0.015533	0.015973
2655	0.013871	0.015435	0.01592
2654	0.013863	0.01534	0.015866
2653	0.013861	0.015249	0.015815
2652	0.013864	0.015162	0.015767
2651	0.01386	0.015074	0.015721
2650	0.013842	0.014984	0.015674
2649	0.01381	0.014889	0.015623
2648	0.013772	0.014791	0.015571
2647	0.013735	0.014693	0.015517
2646	0.013709	0.014595	0.015466
2645	0.013695	0.014499	0.015418
2644	0.013687	0.014403	0.015372
2643	0.013672	0.014308	0.015326
2642	0.013647	0.014217	0.015278
2641	0.013612	0.014128	0.015229
2640	0.013571	0.014036	0.015179
2639	0.013524	0.013941	0.015129
2638	0.013484	0.01385	0.015081
2637	0.013467	0.013771	0.015035
2636	0.013476	0.013698	0.014991
2635	0.013498	0.013621	0.014947
2634	0.013509	0.013534	0.014901
2633	0.013498	0.013441	0.014853
2632	0.013469	0.013349	0.014805
2631	0.013435	0.013262	0.014756
2630	0.013406	0.013181	0.014709
2629	0.013379	0.013103	0.014661
2628	0.013342	0.013021	0.014612
2627	0.013288	0.012932	0.014563
2626	0.013227	0.01284	0.014513
2625	0.013176	0.01275	0.014464
2624	0.01314	0.012663	0.014415
2623	0.013109	0.012574	0.014366
2622	0.013077	0.012486	0.014315
2621	0.01305	0.012404	0.014265
2620	0.013024	0.012322	0.014215
2619	0.012989	0.012232	0.014164
2618	0.012944	0.012134	0.014114
2617	0.012906	0.01204	0.014063
2616	0.012885	0.011959	0.014012
2615	0.012872	0.011883	0.013961
2614	0.012845	0.011799	0.013909
2613	0.012797	0.011708	0.013856
2612	0.012739	0.011619	0.013802
2611	0.012686	0.011539	0.013749
2610	0.012641	0.011467	0.013697
2609	0.012606	0.011393	0.013646
2608	0.012576	0.011312	0.013595
2607	0.012548	0.011226	0.013542
2606	0.012517	0.011141	0.013489
2605	0.012483	0.011063	0.013437
2604	0.012447	0.01099	0.013385
2603	0.012409	0.010919	0.013331
2602	0.012372	0.01085	0.013277
2601	0.012338	0.010785	0.013224
2600	0.01231	0.010719	0.013174
2599	0.012286	0.010649	0.013126
2598	0.012264	0.010575	0.013078
2597	0.012243	0.010501	0.013028
2596	0.012219	0.010431	0.012976
2595	0.012189	0.010361	0.012921
2594	0.012152	0.010293	0.012866
2593	0.01211	0.010224	0.012811
2592	0.012066	0.010156	0.012758
2591	0.012023	0.010086	0.012706
2590	0.011983	0.010018	0.012655
2589	0.01195	0.009953	0.012605
2588	0.011921	0.009891	0.012555
2587	0.011892	0.009827	0.012503
2586	0.01186	0.00976	0.012447
2585	0.011827	0.009691	0.012388
2584	0.011794	0.009622	0.012331
2583	0.011763	0.009553	0.012274
2582	0.011732	0.009488	0.012219
2581	0.0117	0.009424	0.012166
2580	0.011668	0.009362	0.012114
2579	0.011636	0.009301	0.012062
2578	0.011606	0.009241	0.012011
2577	0.011578	0.009183	0.011964
2576	0.011552	0.009125	0.011917
2575	0.011522	0.009065	0.011869
2574	0.011486	0.009001	0.011818
2573	0.011445	0.008935	0.011765
2572	0.011404	0.00887	0.011711
2571	0.01137	0.008809	0.01166
2570	0.011348	0.008753	0.011612
2569	0.011335	0.008701	0.011567
2568	0.011323	0.00865	0.011524
2567	0.011301	0.008596	0.011479
2566	0.01127	0.00854	0.011432
2565	0.011234	0.008483	0.011384
2564	0.011199	0.008428	0.011336
2563	0.011162	0.008371	0.011288
2562	0.011125	0.008312	0.011239
2561	0.011093	0.008253	0.01119
2560	0.011069	0.008197	0.011145
2559	0.011049	0.008145	0.011103
2558	0.011028	0.008096	0.011063
2557	0.011007	0.00805	0.011023
2556	0.010989	0.008003	0.01098
2555	0.010975	0.007949	0.010937
2554	0.010959	0.007888	0.010893
2553	0.010941	0.007824	0.010852
2552	0.010922	0.007763	0.010811
2551	0.010903	0.007704	0.010768
2550	0.010881	0.007646	0.010724
2549	0.010853	0.007592	0.010681
2548	0.010823	0.007541	0.010639
2547	0.010791	0.007487	0.010596
2546	0.010761	0.007427	0.010549
2545	0.010734	0.007372	0.010504
2544	0.010715	0.007333	0.010463
2543	0.010701	0.007309	0.010427
2542	0.010689	0.007287	0.010395
2541	0.010672	0.007252	0.010365
2540	0.010648	0.007203	0.010333
2539	0.010616	0.007145	0.010298
2538	0.010582	0.007092	0.010263
2537	0.010549	0.00705	0.010231
2536	0.010518	0.007013	0.010203
2535	0.010489	0.006972	0.010171
2534	0.010465	0.006931	0.01013
2533	0.010447	0.006903	0.010085
2532	0.010431	0.006887	0.01004
2531	0.010411	0.006866	0.009997
2530	0.010386	0.006828	0.009955
2529	0.010359	0.006778	0.009917
2528	0.01033	0.006726	0.009883
2527	0.0103	0.006677	0.009846
2526	0.010271	0.00663	0.009802
2525	0.010244	0.006584	0.00976
2524	0.010217	0.00654	0.00973
2523	0.010191	0.006494	0.009714
2522	0.010165	0.006449	0.009701
2521	0.010137	0.00641	0.009684
2520	0.01011	0.006373	0.009659
2519	0.010083	0.006332	0.009624
2518	0.010056	0.006285	0.009581
2517	0.010029	0.006237	0.009537
2516	0.010002	0.006191	0.009496
2515	0.009974	0.006145	0.009457
2514	0.009946	0.006096	0.00941
2513	0.009918	0.006049	0.009354
2512	0.00989	0.006004	0.009295
2511	0.009862	0.005962	0.009245
2510	0.009834	0.005923	0.009213
2509	0.009806	0.005884	0.009199
2508	0.009777	0.005838	0.009191
2507	0.009748	0.005783	0.009176
2506	0.009719	0.005724	0.00915
2505	0.00969	0.005674	0.009119
2504	0.009661	0.005636	0.009085
2503	0.009632	0.005606	0.009045
2502	0.009604	0.005581	0.008993
2501	0.009575	0.005557	0.00893
2500	0.009546	0.005527	0.008861
2499	0.009517	0.005483	0.008796
2498	0.009488	0.00543	0.008747
2497	0.009459	0.005379	0.00872
2496	0.009431	0.005329	0.008702
2495	0.009402	0.005268	0.00868
2494	0.009374	0.005198	0.008652
2493	0.009345	0.005134	0.008628
2492	0.009317	0.005086	0.008612
2491	0.009288	0.005048	0.008593
2490	0.009259	0.005015	0.008562
2489	0.009229	0.00499	0.00852
2488	0.0092	0.004966	0.008474
2487	0.00917	0.004927	0.008425
2486	0.009141	0.004869	0.008371
2485	0.009112	0.00481	0.008313
2484	0.009082	0.004766	0.008256
2483	0.009052	0.004734	0.008212
2482	0.009023	0.004703	0.008188
2481	0.008993	0.004665	0.008178
2480	0.008963	0.004616	0.008166
2479	0.008934	0.00456	0.00814
2478	0.008904	0.00451	0.008107
2477	0.008875	0.004478	0.008079
2476	0.008845	0.004448	0.008052
2475	0.008814	0.004398	0.00801
2474	0.008783	0.004326	0.007955
2473	0.008752	0.004253	0.007902
2472	0.008721	0.00419	0.00786
2471	0.00869	0.004121	0.007818
2470	0.008659	0.004033	0.007768
2469	0.008628	0.003935	0.007714
2468	0.008597	0.003846	0.007666
2467	0.008566	0.003775	0.007623
2466	0.008536	0.003729	0.007578
2465	0.008506	0.003711	0.007532
2464	0.008476	0.003712	0.007491
2463	0.008446	0.003714	0.007462
2462	0.008416	0.003706	0.007442
2461	0.008386	0.003685	0.007422
2460	0.008356	0.003647	0.00739
2459	0.008325	0.003591	0.007348
2458	0.008294	0.003536	0.007312
2457	0.008264	0.003507	0.007292
2456	0.008233	0.003509	0.007283
2455	0.008203	0.003513	0.007268
2454	0.008172	0.00349	0.007237
2453	0.008141	0.003435	0.007193
2452	0.00811	0.003364	0.007149
2451	0.008078	0.003295	0.007113
2450	0.008047	0.003234	0.007086
2449	0.008016	0.003177	0.007061
2448	0.007984	0.003116	0.00703
2447	0.007953	0.003056	0.006987
2446	0.007922	0.003007	0.006939
2445	0.00789	0.00297	0.006892
2444	0.007859	0.002928	0.006849
2443	0.007827	0.00286	0.006806
2442	0.007795	0.002771	0.006759
2441	0.007763	0.002681	0.006713
2440	0.007731	0.002608	0.006674
2439	0.007699	0.002557	0.006641
2438	0.007668	0.002527	0.006613
2437	0.007636	0.002507	0.006582
2436	0.007605	0.002478	0.006542
2435	0.007573	0.002426	0.006495
2434	0.007541	0.002358	0.006446
2433	0.007508	0.002297	0.006403
2432	0.007476	0.002251	0.006365
2431	0.007444	0.002211	0.006329
2430	0.007413	0.002165	0.006291
2429	0.007381	0.002111	0.006254
2428	0.007349	0.002055	0.006216
2427	0.007318	0.002004	0.006178
2426	0.007286	0.001963	0.006139
2425	0.007255	0.001935	0.006101
2424	0.007222	0.001912	0.006065
2423	0.00719	0.001883	0.006028
2422	0.007157	0.001845	0.005991
2421	0.007123	0.001801	0.005952
2420	0.00709	0.001753	0.005911
2419	0.007056	0.001703	0.005867
2418	0.007023	0.001651	0.005821
2417	0.006988	0.0016	0.005778
2416	0.006954	0.001552	0.00574
2415	0.006919	0.001509	0.005707
2414	0.006884	0.001473	0.005678
2413	0.006849	0.00144	0.005647
2412	0.006813	0.001406	0.005613
2411	0.006777	0.001366	0.005576
2410	0.006741	0.001325	0.005542
2409	0.006707	0.001289	0.005516
2408	0.006675	0.001257	0.005493
2407	0.00664	0.001218	0.005461
2406	0.0066	0.001174	0.005415
2405	0.006557	0.001133	0.005359
2404	0.006516	0.001098	0.005302
2403	0.006479	0.001065	0.005253
2402	0.006444	0.001033	0.005214
2401	0.006411	0.001003	0.005188
2400	0.00638	0.000978	0.005172
2399	0.006353	0.000954	0.005158
2398	0.006329	0.000931	0.005139
2397	0.006299	0.000905	0.005115
2396	0.006259	0.000875	0.005083
2395	0.00621	0.000843	0.005047
2394	0.006158	0.000812	0.005014
2393	0.006115	0.000784	0.004988
2392	0.006085	0.00076	0.004969
2391	0.006064	0.000739	0.004951
2390	0.006047	0.000719	0.004931
2389	0.006029	0.000699	0.00491
2388	0.006009	0.000676	0.004886
2387	0.00598	0.000651	0.004858
2386	0.00594	0.000622	0.004828
2385	0.005892	0.000594	0.0048
2384	0.005843	0.000571	0.00478
2383	0.005796	0.000552	0.004768
2382	0.005753	0.000539	0.004761
2381	0.005716	0.000528	0.004755
2380	0.005684	0.000516	0.004747
2379	0.005654	0.000502	0.004736
2378	0.005619	0.000487	0.004725
2377	0.005578	0.000475	0.004714
2376	0.005532	0.000465	0.004702
2375	0.005483	0.000455	0.004689
2374	0.00544	0.000445	0.004677
2373	0.005416	0.000435	0.004669
2372	0.005415	0.000428	0.004666
2371	0.005419	0.000423	0.004663
2370	0.00541	0.000418	0.004661
2369	0.005389	0.000415	0.004659
2368	0.005367	0.000413	0.004659
2367	0.005349	0.000413	0.004659
2366	0.005332	0.000416	0.004657
2365	0.005321	0.000421	0.004656
2364	0.005322	0.000427	0.004656
2363	0.005327	0.000431	0.004658
2362	0.005316	0.000433	0.004659
2361	0.005285	0.000433	0.00466
2360	0.005245	0.000433	0.004662
2359	0.005215	0.000435	0.004665
2358	0.005201	0.000441	0.004671
2357	0.005205	0.000453	0.004681
2356	0.00522	0.000468	0.004693
2355	0.005228	0.000481	0.004705
2354	0.005223	0.000491	0.004714
2353	0.005211	0.000502	0.004723
2352	0.00521	0.000514	0.00473
2351	0.00522	0.000526	0.004739
2350	0.00523	0.000538	0.004749
2349	0.00523	0.000547	0.00476
2348	0.00522	0.000558	0.004773
2347	0.005213	0.000573	0.004788
2346	0.005229	0.000592	0.004802
2345	0.005272	0.000615	0.004816
2344	0.00532	0.000637	0.00483
2343	0.005338	0.000652	0.004842
2342	0.00532	0.000662	0.004853
2341	0.005291	0.00067	0.004863
2340	0.00528	0.000679	0.004873
2339	0.005289	0.00069	0.004884
2338	0.005314	0.000704	0.004896
2337	0.005357	0.000728	0.004908
2336	0.005415	0.000755	0.004922
2335	0.005464	0.000776	0.004936
2334	0.00548	0.000786	0.004949
2333	0.005465	0.00079	0.00496
2332	0.005441	0.000793	0.004967
2331	0.00543	0.000794	0.004969
2330	0.005447	0.000798	0.004969
2329	0.005504	0.000815	0.004974
2328	0.005602	0.000857	0.004986
2327	0.005725	0.000912	0.005006
2326	0.005842	0.000963	0.005029
2325	0.005928	0.000994	0.005052
2324	0.005973	0.001003	0.005067
2323	0.005986	0.000999	0.005071
2322	0.005992	0.000996	0.005069
2321	0.006006	0.001002	0.005066
2320	0.006015	0.000999	0.005065
2319	0.005998	0.000977	0.005063
2318	0.005965	0.000944	0.00506
2317	0.005952	0.000931	0.00506
2316	0.005976	0.000938	0.005065
2315	0.006017	0.00095	0.005068
2314	0.006042	0.000946	0.005064
2313	0.006045	0.000933	0.005052
2312	0.006043	0.000922	0.005038
2311	0.006049	0.000916	0.005032
2310	0.006061	0.000912	0.005033
2309	0.006077	0.000905	0.005035
2308	0.00609	0.000892	0.00503
2307	0.006103	0.000875	0.00502
2306	0.006122	0.000868	0.005012
2305	0.006159	0.000886	0.005012
2304	0.006214	0.00092	0.005017
2303	0.006269	0.00095	0.00502
2302	0.006305	0.000961	0.00502
2301	0.006324	0.000963	0.005018
2300	0.006337	0.000962	0.005017
2299	0.006348	0.000963	0.005015
2298	0.00635	0.000962	0.005009
2297	0.006343	0.000956	0.004998
2296	0.00633	0.00094	0.004983
2295	0.006318	0.000918	0.004967
2294	0.006314	0.000914	0.004958
2293	0.006331	0.000944	0.004957
2292	0.006367	0.000994	0.004958
2291	0.006412	0.001033	0.004955
2290	0.006458	0.001045	0.004948
2289	0.00651	0.001044	0.00494
2288	0.006564	0.001039	0.004931
2287	0.006593	0.001026	0.004918
2286	0.006574	0.001004	0.004902
2285	0.006509	0.000983	0.004889
2284	0.006424	0.000969	0.004881
2283	0.006341	0.000953	0.004874
2282	0.006269	0.000929	0.004863
2281	0.006217	0.000899	0.00485
2280	0.006196	0.000875	0.004837
2279	0.006207	0.000868	0.004829
2278	0.006232	0.000885	0.004824
2277	0.006247	0.000916	0.004823
2276	0.006234	0.000934	0.004821
2275	0.006199	0.00092	0.004816
2274	0.006163	0.000881	0.00481
2273	0.006151	0.000847	0.004806
2272	0.006162	0.000833	0.004803
2271	0.006175	0.00083	0.004797
2270	0.006174	0.000829	0.004787
2269	0.006159	0.00083	0.004778
2268	0.006137	0.000835	0.00477
2267	0.00611	0.000838	0.004764
2266	0.00608	0.000843	0.004761
2265	0.006063	0.000853	0.004761
2264	0.006074	0.000866	0.004763
2263	0.006111	0.000872	0.004765
2262	0.006148	0.000865	0.004765
2261	0.006161	0.000857	0.004764
2260	0.006149	0.000859	0.004763
2259	0.006127	0.00087	0.004761
2258	0.006114	0.000885	0.004758
2257	0.006117	0.0009	0.004756
2256	0.006131	0.000906	0.004754
2255	0.006149	0.0009	0.004752
2254	0.006163	0.000893	0.004752
2253	0.006172	0.000898	0.004757
2252	0.006174	0.000919	0.004767
2251	0.006168	0.000944	0.004776
2250	0.006155	0.000958	0.004783
2249	0.006144	0.00096	0.004787
2248	0.006141	0.000958	0.00479
2247	0.006143	0.00096	0.004789
2246	0.006146	0.000967	0.004787
2245	0.006147	0.000978	0.004787
2244	0.006145	0.00099	0.004791
2243	0.006144	0.001006	0.004801
2242	0.006145	0.001032	0.004816
2241	0.006147	0.001064	0.004831
2240	0.006148	0.001085	0.00484
2239	0.006148	0.001084	0.004843
2238	0.006146	0.001078	0.004845
2237	0.006143	0.001086	0.004856
2236	0.00614	0.001103	0.004871
2235	0.006138	0.001105	0.004877
2234	0.006137	0.001087	0.004868
2233	0.006137	0.001064	0.004851
2232	0.006137	0.001053	0.004836
2231	0.006137	0.001054	0.004827
2230	0.006137	0.001069	0.004827
2229	0.006139	0.001103	0.00484
2228	0.006144	0.001152	0.004862
2227	0.006152	0.001197	0.004884
2226	0.00616	0.001218	0.004897
2225	0.006167	0.00121	0.0049
2224	0.006171	0.001184	0.0049
2223	0.00617	0.00116	0.004899
2222	0.006168	0.001162	0.004901
2221	0.006167	0.001191	0.004908
2220	0.006171	0.001218	0.004922
2219	0.006181	0.001215	0.00494
2218	0.006196	0.001206	0.004966
2217	0.006214	0.001233	0.004999
2216	0.006226	0.001294	0.005024
2215	0.006228	0.001347	0.005024
2214	0.006221	0.001364	0.005005
2213	0.006213	0.001364	0.004985
2212	0.00621	0.00137	0.004971
2211	0.006214	0.001388	0.004953
2210	0.006223	0.001428	0.004931
2209	0.006235	0.001486	0.00492
2208	0.006243	0.001529	0.004924
2207	0.006235	0.001529	0.004927
2206	0.006213	0.001515	0.004916
2205	0.006195	0.001538	0.004909
2204	0.006192	0.001588	0.004927
2203	0.006198	0.001617	0.004962
2202	0.006217	0.001638	0.005009
2201	0.006259	0.001708	0.005069
2200	0.006312	0.001822	0.005124
2199	0.006336	0.001899	0.005139
2198	0.006337	0.0019	0.005119
2197	0.006361	0.001872	0.005098
2196	0.006431	0.001866	0.005081
2195	0.006505	0.001884	0.005038
2194	0.006534	0.001932	0.004973
2193	0.006522	0.002042	0.00493
2192	0.006503	0.002215	0.004943
2191	0.0065	0.002402	0.005009
2190	0.006531	0.002571	0.005131
2189	0.006611	0.002707	0.005301
2188	0.006721	0.002758	0.005453
2187	0.006805	0.002663	0.005499
2186	0.006819	0.002461	0.005439
2185	0.00676	0.002265	0.005362
2184	0.006629	0.002126	0.005315
2183	0.006422	0.001997	0.005256
2182	0.006192	0.001866	0.005156
2181	0.006037	0.001805	0.005061
2180	0.006001	0.001852	0.005019
2179	0.006035	0.00196	0.005021
2178	0.006085	0.002076	0.005049
2177	0.006155	0.002189	0.005116
2176	0.006253	0.002268	0.005215
2175	0.006334	0.002251	0.005295
2174	0.006355	0.002146	0.005321
2173	0.006338	0.00205	0.005314
2172	0.006349	0.002041	0.005309
2171	0.006422	0.002112	0.005324
2170	0.00654	0.002224	0.005388
2169	0.006658	0.002346	0.005525
2168	0.00673	0.002439	0.005696
2167	0.006744	0.002474	0.005807
2166	0.006749	0.002477	0.005818
2165	0.006819	0.002506	0.005792
2164	0.006959	0.002541	0.00581
2163	0.007074	0.002496	0.005865
2162	0.007018	0.002321	0.005848
2161	0.006673	0.002025	0.005617
2160	0.006014	0.001613	0.005105
2159	0.005184	0.001132	0.004437
2158	0.004471	0.000738	0.003915
2157	0.004089	0.000566	0.003727
2156	0.004016	0.000573	0.003773
2155	0.00408	0.00062	0.003821
2154	0.004171	0.000673	0.003782
2153	0.004292	0.00079	0.003741
2152	0.004446	0.000955	0.003776
2151	0.004573	0.001071	0.003857
2150	0.004631	0.001098	0.003937
2149	0.004655	0.001084	0.004017
2148	0.004699	0.001059	0.004094
2147	0.004771	0.001003	0.004139
2146	0.004852	0.000926	0.004155
2145	0.004932	0.00089	0.004178
2144	0.004991	0.000917	0.004221
2143	0.004999	0.00098	0.004256
2142	0.004958	0.001054	0.004268
2141	0.004918	0.001118	0.004265
2140	0.004926	0.001127	0.004244
2139	0.00498	0.001062	0.004199
2138	0.005044	0.000994	0.004156
2137	0.005081	0.001016	0.004143
2136	0.005061	0.001103	0.004132
2135	0.004976	0.001156	0.004082
2134	0.004857	0.00115	0.004027
2133	0.004767	0.001165	0.004047
2132	0.004749	0.001254	0.004166
2131	0.004799	0.001384	0.004315
2130	0.00488	0.00149	0.004423
2129	0.00495	0.001532	0.004473
2128	0.004986	0.001514	0.004483
2127	0.004991	0.001472	0.004483
2126	0.005005	0.001475	0.004508
2125	0.005061	0.001552	0.004563
2124	0.005162	0.001654	0.004616
2123	0.005292	0.001717	0.004646
2122	0.005447	0.001754	0.004696
2121	0.005632	0.001823	0.004828
2120	0.005827	0.001931	0.005023
2119	0.006005	0.002026	0.005187
2118	0.006155	0.002071	0.005263
2117	0.006283	0.002075	0.005283
2116	0.006373	0.002053	0.005301
2115	0.006384	0.00201	0.005306
2114	0.006299	0.001977	0.005264
2113	0.00616	0.001987	0.005189
2112	0.006034	0.002025	0.005123
2111	0.00597	0.002046	0.005097
2110	0.005984	0.002042	0.005117
2109	0.006048	0.002041	0.005154
2108	0.006094	0.002061	0.005161
2107	0.006089	0.002097	0.005123
2106	0.006068	0.002149	0.005078
2105	0.006077	0.002205	0.005071
2104	0.006104	0.00222	0.005096
2103	0.006103	0.002157	0.005115
2102	0.006073	0.002046	0.005126
2101	0.006054	0.001956	0.005154
2100	0.006061	0.001911	0.005197
2099	0.006066	0.001891	0.005217
2098	0.006038	0.001883	0.005194
2097	0.005972	0.001881	0.00514
2096	0.00586	0.001858	0.005075
2095	0.005717	0.001793	0.005014
2094	0.0056	0.001719	0.004983
2093	0.005574	0.001691	0.004993
2092	0.005635	0.001705	0.005018
2091	0.005718	0.001713	0.005023
2090	0.005785	0.001697	0.00501
2089	0.005843	0.001687	0.005004
2088	0.005903	0.001699	0.005011
2087	0.005958	0.001722	0.005019
2086	0.006015	0.001754	0.005032
2085	0.006092	0.001797	0.005064
2084	0.006183	0.001835	0.005102
2083	0.006254	0.00184	0.005119
2082	0.006292	0.001813	0.005103
2081	0.006318	0.001784	0.005073
2080	0.006342	0.001763	0.005049
2079	0.006346	0.001742	0.005037
2078	0.006318	0.001717	0.005034
2077	0.006271	0.00169	0.005027
2076	0.006221	0.001652	0.005005
2075	0.006185	0.001606	0.004972
2074	0.006185	0.001578	0.004948
2073	0.00623	0.001586	0.004946
2072	0.006295	0.001604	0.004955
2071	0.006339	0.001595	0.004954
2070	0.006345	0.001558	0.004938
2069	0.006323	0.001517	0.004917
2068	0.006274	0.001479	0.004895
2067	0.006201	0.001438	0.004872
2066	0.006127	0.001398	0.004853
2065	0.006081	0.001371	0.004844
2064	0.006061	0.001352	0.004835
2063	0.006042	0.001327	0.004813
2062	0.006026	0.001302	0.004787
2061	0.006031	0.001287	0.00477
2060	0.006055	0.001278	0.004753
2059	0.006075	0.00126	0.004718
2058	0.006093	0.001235	0.004677
2057	0.006134	0.001218	0.004659
2056	0.006194	0.001206	0.004661
2055	0.00625	0.001188	0.004661
2054	0.0063	0.001165	0.004657
2053	0.006363	0.001147	0.004675
2052	0.006432	0.001135	0.004715
2051	0.006461	0.001114	0.004738
2050	0.006423	0.001078	0.004717
2049	0.006341	0.001039	0.004665
2048	0.006253	0.001004	0.004608
2047	0.006174	0.000968	0.004547
2046	0.006114	0.000928	0.004488
2045	0.006092	0.000889	0.004462
2044	0.006114	0.000853	0.004487
2043	0.006148	0.00082	0.004543
2042	0.006153	0.000784	0.00459
[truncated: 1,399 more rows]
[truncated: 7 more columns]
